# Supplementary material for: Performance Improvement of Machine Learning Model Using Autoencoder to Predict Demolition Waste Generation Rate
Source: MDPI journal article supplement (doi:10.3390/su15043691), 2023-02-16
Supplement: s1 [file s1]

Archive with 1 entries (1 files):
- sustainability-2221551-supplementary.pdf
