# Supplementary material for: Performance Improvement of Machine Learning Model Using Autoencoder to Predict Demolition Waste Generation Rate
Source: MDPI journal article supplement (doi:10.3390/su15043691), 2023-02-16
Supplement: s1 [file s1 › sustainability-2221551-supplementary.pdf]

## Supplementary Material

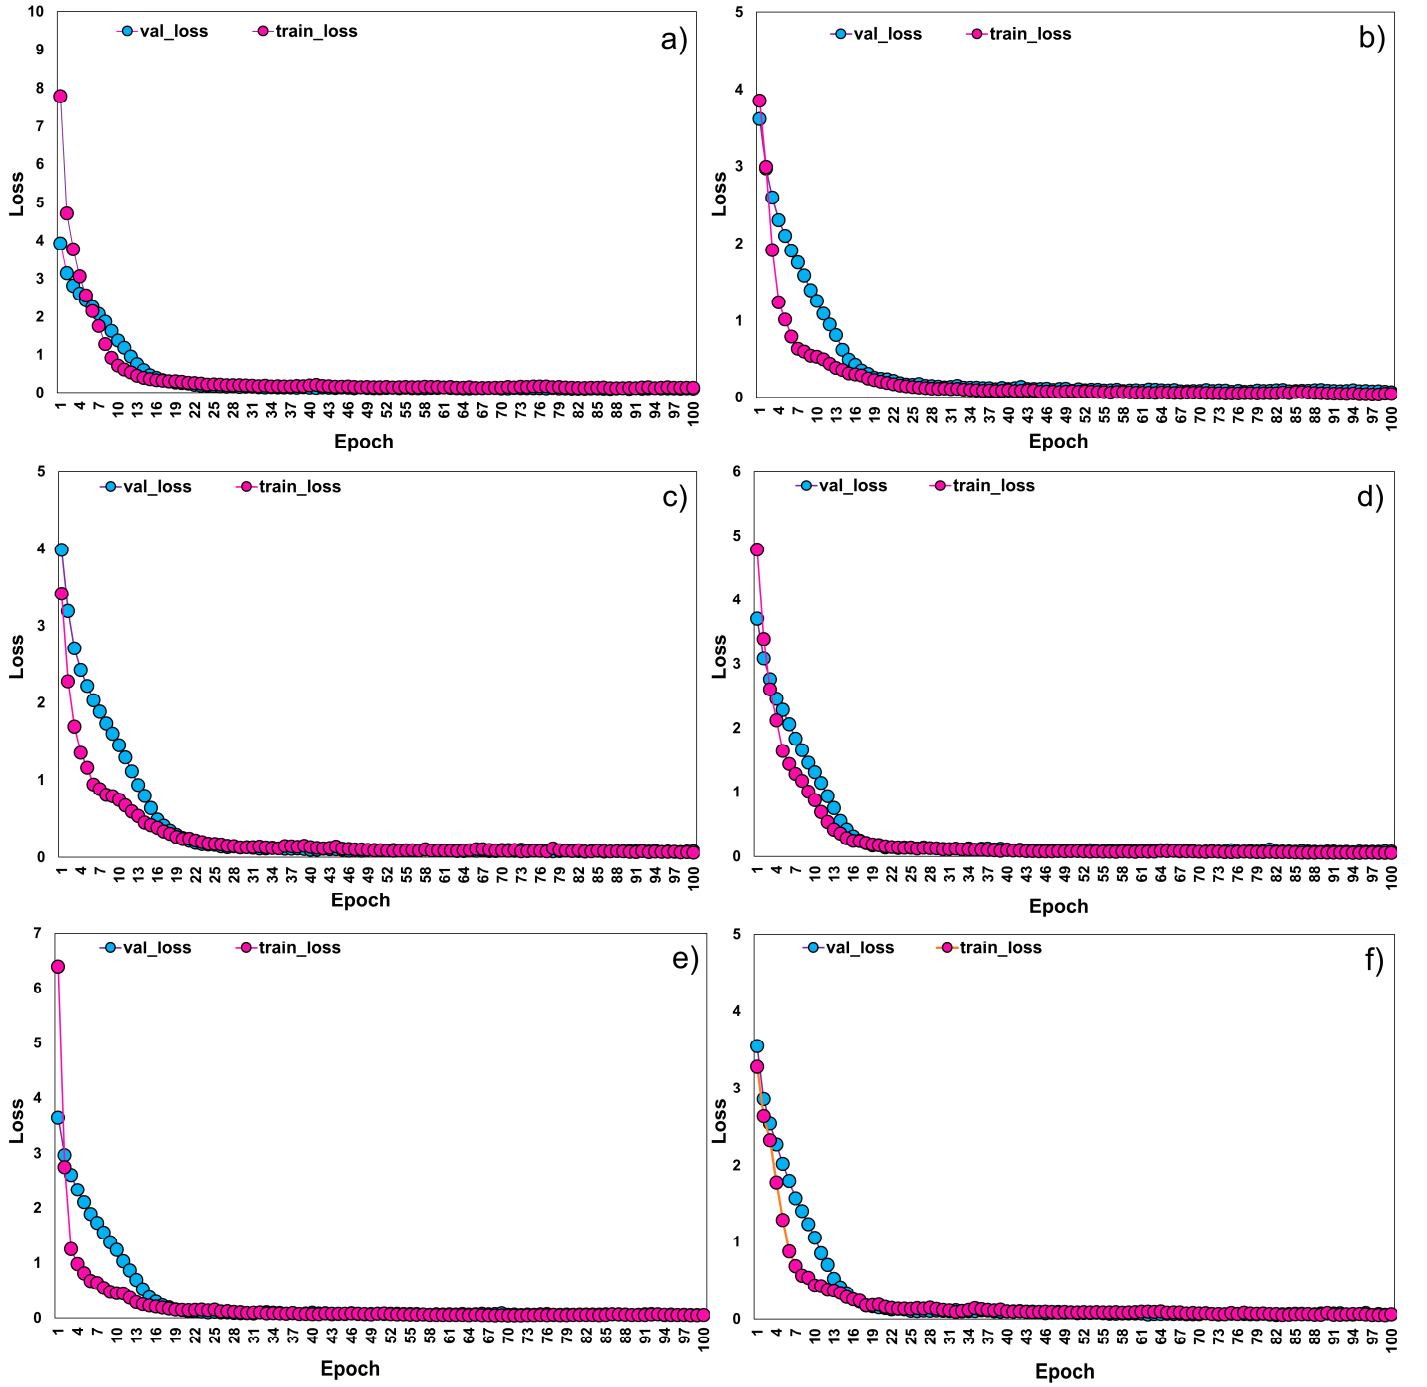

**Figure S1.** Loss results according to feature representation size of AE: 3, 9, 15, 20, 25, and 30 features arranged from (a–g), respectively.

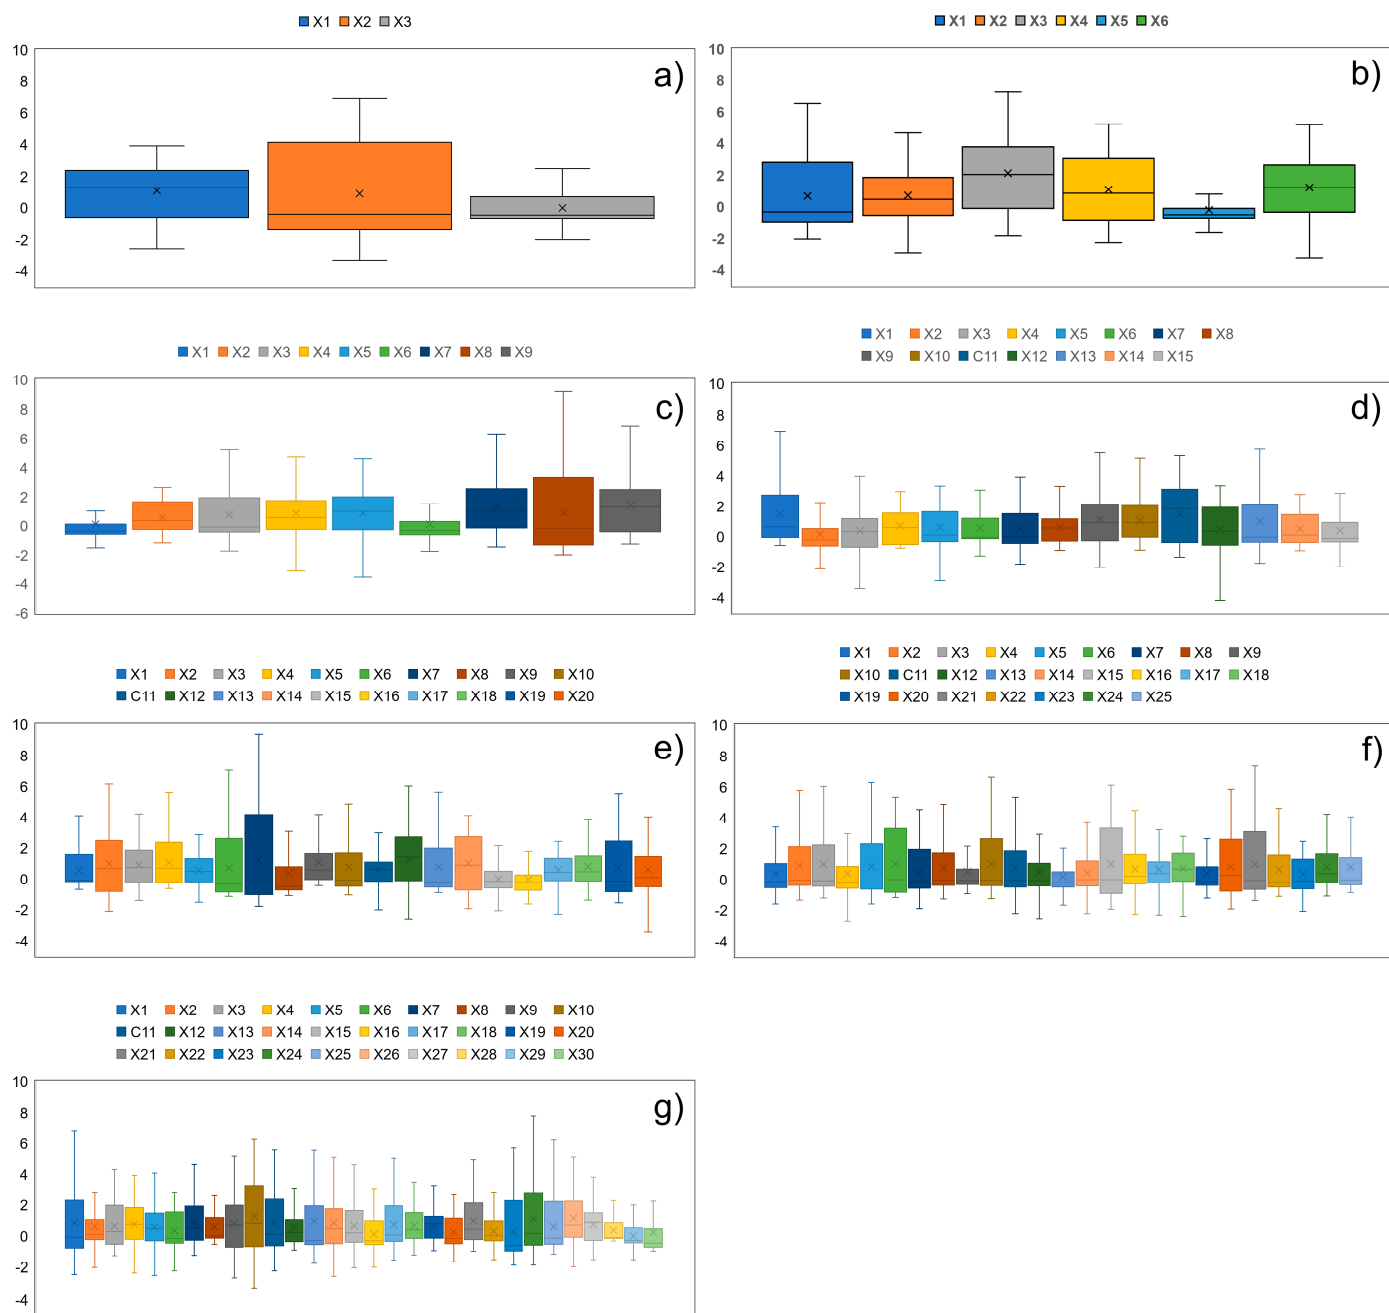

**Figure S2.** Distribution of data values by feature representation size: 3, 6, 9, 15, 20, 25, and 30 features arranged from (a–g), respectively.
